# Supplementary material for: cor, a Novel Carbon Monoxide Resistance Gene, Is Essential for Mycobacterium tuberculosis Pathogenesis
Source: PubMed Central journal article supplement — mBio. 2013 Nov 19;4(6):e00721-13. doi: 10.1128/mBio.00721-13 (PMC3870250; doi:10.1128/mbio.00721-13), 2013-11-19
Supplement: mbo006131678st1.pdf [file mbo006131678st1.pdf]

**Pathway Heat Map** This is the heatmap associated with the statistical analysis of the data  
Indicates ratios, *p*- and *q*-values for each comparison

|      |                                                                                                                                        |
|------|----------------------------------------------------------------------------------------------------------------------------------------|
| 0.55 | <b>Green:</b> indicates significant difference ( $p \leq 0.05$ ) between the groups shown; GREEN indicates a metabolite ratio of $< 1$ |
| 1.71 | <b>Red:</b> indicates significant difference ( $p \leq 0.05$ ) between the groups shown; RED indicates a metabolite ratio of $> 1$     |
| 1.43 | <b>Bold blue:</b> narrowly missed statistical cutoff for significance; $0.05 < p < 0.10$                                               |
| 1.20 | <b>Non-colored text and cell:</b> mean values are not significantly different for that comparison                                      |

| Heat map of statistically significant biochemicals profiled in this study. For paired comparisons, shaded cells indicate $p \leq 0.05$ (red indicates that the mean values are significantly higher for that comparison; green values significantly lower). Blue-bolded text indicates $0.05 < p < 0.10$ . |                        |                                               |                               |           |                        |                               |                           | Fold of Change            |             |             |             |             |
|------------------------------------------------------------------------------------------------------------------------------------------------------------------------------------------------------------------------------------------------------------------------------------------------------------|------------------------|-----------------------------------------------|-------------------------------|-----------|------------------------|-------------------------------|---------------------------|---------------------------|-------------|-------------|-------------|-------------|
|                                                                                                                                                                                                                                                                                                            |                        |                                               |                               |           |                        |                               |                           | Welch's two-Sample T-test |             |             |             |             |
| PATHWAY SORT                                                                                                                                                                                                                                                                                               | SUPER PATHWAY          | SUB PATHWAY                                   | BIOCHEMICAL NAME              | PLATFORM  | COMP ID                | Kegg                          | HMDB                      | Day 0                     | Day 5       |             | Day 10      |             |
|                                                                                                                                                                                                                                                                                                            |                        |                                               |                               |           |                        |                               |                           |                           | (-CO)       | (+CO)       | (-CO)       | (+CO)       |
| 1                                                                                                                                                                                                                                                                                                          | Amino acid             | Glycine, serine and threonine metabolism      | glycine                       | GC/MS     | 11777                  | <a href="#">C00037</a>        | <a href="#">HMDB00123</a> | 1.06                      | 0.65        | 1.23        | 0.71        | 1.01        |
| 3                                                                                                                                                                                                                                                                                                          |                        |                                               | dimethylglycine               | GC/MS     | 5086                   | <a href="#">C01026</a>        | <a href="#">HMDB00092</a> | 0.90                      | 1.11        | 1.16        | 1.13        | <b>1.90</b> |
| 6                                                                                                                                                                                                                                                                                                          |                        |                                               | beta-hydroxypropyruvate       | GC/MS     | 15686                  | <a href="#">C00168</a>        | <a href="#">HMDB01352</a> | 1.07                      | 0.77        | 1.71        | 1.01        | 1.58        |
| 7                                                                                                                                                                                                                                                                                                          |                        |                                               | serine                        | GC/MS     | 1648                   | <a href="#">C00065</a>        | <a href="#">HMDB03406</a> | <b>0.79</b>               | 0.91        | 0.64        | <b>0.81</b> | <b>0.38</b> |
| 11                                                                                                                                                                                                                                                                                                         |                        |                                               | homoserine                    | GC/MS     | 23642                  | <a href="#">C00263_C02926</a> | <a href="#">HMDB00719</a> | 1.14                      | 0.82        | 0.74        | 0.82        | <b>0.38</b> |
| 16                                                                                                                                                                                                                                                                                                         |                        |                                               | threonine                     | GC/MS     | 1284                   | <a href="#">C00188</a>        | <a href="#">HMDB00167</a> | <b>0.61</b>               | 1.04        | <b>0.76</b> | 0.72        | <b>0.52</b> |
| 23                                                                                                                                                                                                                                                                                                         |                        | Alanine and aspartate metabolism              | alanine                       | GC/MS     | 1126                   | <a href="#">C00041</a>        | <a href="#">HMDB00161</a> | 0.85                      | <b>0.85</b> | 0.93        | <b>0.68</b> | <b>0.63</b> |
| 27                                                                                                                                                                                                                                                                                                         |                        |                                               | N-acetyl-beta-alanine         | LC/MS pos | 37432                  | <a href="#">C01073</a>        |                           | 1.09                      | 0.93        | 1.14        | 1.14        | <b>1.48</b> |
| 29                                                                                                                                                                                                                                                                                                         |                        |                                               | aspartate                     | GC/MS     | 15996                  | <a href="#">C00049</a>        | <a href="#">HMDB00191</a> | 0.92                      | 0.92        | 0.88        | 0.65        | <b>0.44</b> |
| 38                                                                                                                                                                                                                                                                                                         |                        | Glutamate metabolism                          | glutamate                     | LC/MS pos | 57                     | <a href="#">C00025</a>        | <a href="#">HMDB03339</a> | <b>1.13</b>               | 0.90        | <b>1.17</b> | 0.91        | <b>1.28</b> |
| 41                                                                                                                                                                                                                                                                                                         |                        |                                               | glutamate, gamma-methyl ester | LC/MS pos | 33487                  |                               |                           | 1.17                      | 0.92        | <b>1.37</b> | 0.93        | <b>1.84</b> |
| 42                                                                                                                                                                                                                                                                                                         |                        |                                               | glutamine                     | GC/MS     | 1647                   | <a href="#">C00064</a>        | <a href="#">HMDB00641</a> | 0.95                      | <b>0.79</b> | 0.76        | 1.89        | <b>0.33</b> |
| 44                                                                                                                                                                                                                                                                                                         |                        |                                               | gamma-aminobutyrate (GABA)    | GC/MS     | 1416                   | <a href="#">C00334</a>        | <a href="#">HMDB00112</a> | <b>1.57</b>               | 1.47        | 1.88        | 1.01        | <b>1.19</b> |
| 45                                                                                                                                                                                                                                                                                                         |                        |                                               | N-acetylglutamate             | LC/MS pos | 15720                  | <a href="#">C00624</a>        | <a href="#">HMDB01138</a> | 1.10                      | 0.89        | 0.94        | 1.07        | <b>0.43</b> |
| 48                                                                                                                                                                                                                                                                                                         |                        | Histidine metabolism                          | histidine                     | GC/MS     | 59                     | <a href="#">C00135</a>        | <a href="#">HMDB00177</a> | 0.94                      | 0.99        | 1.10        | 0.64        | 1.13        |
| 66                                                                                                                                                                                                                                                                                                         |                        | Lysine metabolism                             | lysine                        | LC/MS pos | 1301                   | <a href="#">C00047</a>        | <a href="#">HMDB00182</a> | 0.79                      | 1.15        | 0.84        | 0.97        | 0.98        |
| 67                                                                                                                                                                                                                                                                                                         |                        |                                               | 2-aminoadipate                | GC/MS     | 6146                   | <a href="#">C00956</a>        | <a href="#">HMDB00510</a> | 1.00                      | <b>1.52</b> | 1.27        | 0.44        | 0.84        |
| 69                                                                                                                                                                                                                                                                                                         |                        |                                               | pipecolate                    | LC/MS pos | 1444                   | <a href="#">C00408</a>        | <a href="#">HMDB00070</a> | 0.90                      | 0.95        | 1.51        | <b>0.58</b> | <b>1.66</b> |
| 74                                                                                                                                                                                                                                                                                                         |                        |                                               | N6-acetyllysine               | LC/MS pos | 36752                  | <a href="#">C02727</a>        | <a href="#">HMDB00206</a> | <b>0.81</b>               | 1.01        | 1.23        | <b>0.60</b> | 1.47        |
| 78                                                                                                                                                                                                                                                                                                         |                        | Phenylalanine & tyrosine metabolism           | phenylalanine                 | LC/MS pos | 64                     | <a href="#">C00079</a>        | <a href="#">HMDB00159</a> | 0.99                      | 1.06        | 1.07        | 0.78        | 1.05        |
| 90                                                                                                                                                                                                                                                                                                         |                        |                                               | tyrosine                      | LC/MS pos | 1299                   | <a href="#">C00082</a>        | <a href="#">HMDB00158</a> | 1.00                      | 0.96        | 0.97        | <b>0.65</b> | 0.70        |
| 126                                                                                                                                                                                                                                                                                                        |                        | Tryptophan metabolism                         | tryptophan                    | LC/MS pos | 54                     | <a href="#">C00078</a>        | <a href="#">HMDB00929</a> | 0.92                      | 1.02        | 0.99        | <b>0.74</b> | 0.77        |
| 157                                                                                                                                                                                                                                                                                                        |                        | Valine, leucine and isoleucine metabolism     | isoleucine                    | LC/MS pos | 1125                   | <a href="#">C00407</a>        | <a href="#">HMDB00172</a> | <b>0.88</b>               | 1.00        | <b>0.81</b> | 0.84        | 0.85        |
| 158                                                                                                                                                                                                                                                                                                        |                        |                                               | leucine                       | LC/MS pos | 60                     | <a href="#">C00123</a>        | <a href="#">HMDB00687</a> | 0.93                      | 0.88        | <b>0.81</b> | 0.89        | 0.83        |
| 167                                                                                                                                                                                                                                                                                                        |                        |                                               | valine                        | LC/MS pos | 1649                   | <a href="#">C00183</a>        | <a href="#">HMDB00883</a> | 0.93                      | 0.91        | 0.74        | <b>0.83</b> | <b>0.48</b> |
| 188                                                                                                                                                                                                                                                                                                        |                        | Cysteine, methionine, SAM, taurine metabolism | cysteine                      | GC/MS     | 31453                  | <a href="#">C00097</a>        | <a href="#">HMDB00574</a> | 0.97                      | 1.01        | 1.11        | 1.14        | <b>0.74</b> |
| 198                                                                                                                                                                                                                                                                                                        |                        |                                               | adenosylhomocysteine (SAH)    | LC/MS pos | 15948                  | <a href="#">C00021</a>        | <a href="#">HMDB00939</a> | <b>1.22</b>               | 0.98        | 0.87        | 0.83        | <b>0.68</b> |
| 213                                                                                                                                                                                                                                                                                                        |                        | Urea cycle; arginine-, proline-, metabolism   | arginine                      | GC/MS     | 1638                   | <a href="#">C00062</a>        | <a href="#">HMDB00517</a> | 0.90                      | <b>0.80</b> | 0.96        | 0.53        | 0.60        |
| 218                                                                                                                                                                                                                                                                                                        |                        |                                               | proline                       | LC/MS pos | 1898                   | <a href="#">C00148</a>        | <a href="#">HMDB00162</a> | 0.97                      | <b>0.72</b> | 0.83        | <b>0.72</b> | <b>0.46</b> |
| 220                                                                                                                                                                                                                                                                                                        |                        |                                               | citulline                     | LC/MS pos | 2132                   | <a href="#">C00327</a>        | <a href="#">HMDB00904</a> | 1.14                      | <b>0.84</b> | <b>0.79</b> | <b>0.68</b> | <b>0.63</b> |
| 221                                                                                                                                                                                                                                                                                                        |                        |                                               | N-acetylmethionine            | LC/MS pos | 15630                  | <a href="#">C00437</a>        | <a href="#">HMDB03357</a> | <b>0.75</b>               | 1.10        | 1.17        | <b>0.49</b> | 0.84        |
| 238                                                                                                                                                                                                                                                                                                        |                        | Polyamine metabolism                          | 5-methylthioadenosine (MTA)   | LC/MS pos | 1419                   | <a href="#">C00170</a>        | <a href="#">HMDB01173</a> | 1.22                      | 0.81        | 0.91        | 0.81        | <b>0.32</b> |
| 253                                                                                                                                                                                                                                                                                                        | Glutathione metabolism | 5-oxoproline                                  | LC/MS neg                     | 1494      | <a href="#">C01879</a> | <a href="#">HMDB00267</a>     | 1.01                      | 0.94                      | 0.84        | 1.55        | 0.67        |             |
| 321                                                                                                                                                                                                                                                                                                        |                        | gamma-glutamylvaline                          | LC/MS pos                     | 32393     |                        | <a href="#">HMDB11172</a>     | 1.06                      | 0.86                      | <b>0.76</b> | <b>0.72</b> | <b>0.24</b> |             |
| 322                                                                                                                                                                                                                                                                                                        |                        | gamma-glutamyl-2-aminobutyrate                | LC/MS pos                     | 37092     |                        |                               | 0.94                      | 1.07                      | 0.81        | <b>1.50</b> | <b>0.50</b> |             |
| 323                                                                                                                                                                                                                                                                                                        |                        | gamma-glutamylleucine                         | LC/MS pos                     | 18369     |                        | <a href="#">HMDB11171</a>     | 1.07                      | <b>0.78</b>               | 0.76        | <b>0.58</b> | <b>0.19</b> |             |
| 324                                                                                                                                                                                                                                                                                                        |                        | gamma-glutamylisoleucine*                     | LC/MS pos                     | 34456     |                        | <a href="#">HMDB11170</a>     | 1.06                      | <b>0.83</b>               | 0.81        | <b>0.53</b> | <b>0.32</b> |             |
| 327                                                                                                                                                                                                                                                                                                        |                        | gamma-glutamylmethionine                      | LC/MS pos                     | 37539     |                        |                               | 1.05                      | 1.05                      | 0.69        | 0.65        | <b>0.21</b> |             |

|       |                                                    |                                                              |                                                  |                           |                           |                           |                                     |                           |      |      |      |      |
|-------|----------------------------------------------------|--------------------------------------------------------------|--------------------------------------------------|---------------------------|---------------------------|---------------------------|-------------------------------------|---------------------------|------|------|------|------|
| 328   | Peptide                                            | gamma-glutamyl                                               | gamma-glutamylglutamate                          | LC/MS pos                 | 36738                     |                           |                                     | 0.96                      | 0.93 | 1.08 | 0.81 | 0.78 |
| 329   |                                                    |                                                              | gamma-glutamylglutamine                          | LC/MS pos                 | 2730                      |                           | <a href="#">HMDB11738</a>           | 1.03                      | 0.85 | 0.65 | 1.26 | 0.23 |
| 331   |                                                    |                                                              | gamma-glutamylphenylalanine                      | LC/MS pos                 | 33422                     |                           | <a href="#">HMDB00594</a>           | 1.10                      | 1.00 | 0.80 | 0.58 | 0.41 |
| 332   |                                                    |                                                              | gamma-glutamyltyrosine                           | LC/MS pos                 | 2734                      |                           |                                     | 0.96                      | 1.03 | 0.85 | 0.73 | 0.73 |
| 333   |                                                    |                                                              | gamma-glutamylthreonine*                         | LC/MS pos                 | 33364                     |                           |                                     | 1.02                      | 0.94 | 0.69 | 0.54 | 0.31 |
| 336   |                                                    |                                                              | gamma-glutamylalanine                            | LC/MS pos                 | 37063                     |                           |                                     | 0.95                      | 0.96 | 0.93 | 0.94 | 0.31 |
| 368   | Carbohydrate                                       | Aminosugars metabolism                                       | N-acetylglucosamine                              | GC/MS                     | 15095                     | <a href="#">C00140</a>    | <a href="#">HMDB00215</a>           | 1.00                      | 0.89 | 1.00 | 0.80 | 0.50 |
| 372   |                                                    |                                                              | erythronate*                                     | GC/MS                     | 33477                     |                           | <a href="#">HMDB00613</a>           | 1.12                      | 0.81 | 1.52 | 1.21 | 2.08 |
| 388   |                                                    | Fructose, mannose, galactose, starch, and sucrose metabolism | erythrose                                        | GC/MS                     | 27722                     | <a href="#">C01796</a>    | <a href="#">HMDB02649</a>           | 1.58                      | 0.64 | 1.37 | 0.83 | 1.91 |
| 390   |                                                    |                                                              | galactitol (dulcitol)                            | GC/MS                     | 1117                      | <a href="#">C01697</a>    | <a href="#">HMDB00107</a>           | 0.88                      | 1.44 | 1.02 | 0.71 | 0.57 |
| 391   |                                                    |                                                              | galactose                                        | GC/MS                     | 12055                     | <a href="#">C01582</a>    | <a href="#">HMDB00143</a>           | 1.18                      | 1.00 | 1.00 | 0.36 | 1.00 |
| 397   |                                                    |                                                              | maltose                                          | GC/MS                     | 15806                     | <a href="#">C00208</a>    | <a href="#">HMDB00163</a>           | 0.97                      | 0.70 | 1.01 | 0.67 | 1.12 |
| 402   |                                                    |                                                              | mannose                                          | GC/MS                     | 584                       | <a href="#">C00159</a>    | <a href="#">HMDB00169</a>           | 0.95                      | 0.73 | 1.02 | 0.72 | 0.93 |
| 404   |                                                    |                                                              | mannose-6-phosphate                              | GC/MS                     | 1470                      | <a href="#">C00275</a>    | <a href="#">HMDB01078</a>           | 1.00                      | 1.29 | 1.02 | 0.93 | 1.18 |
| 410   |                                                    |                                                              | sorbitol                                         | GC/MS                     | 15053                     | <a href="#">C00794</a>    | <a href="#">HMDB00247</a>           | 0.87                      | 1.11 | 1.44 | 1.27 | 1.62 |
| 416   |                                                    |                                                              | trehalose                                        | GC/MS                     | 15573                     | <a href="#">C01083</a>    | <a href="#">HMDB00975</a>           | 0.97                      | 0.88 | 1.02 | 0.59 | 0.69 |
| 432   |                                                    |                                                              | glycerate                                        | GC/MS                     | 1572                      | <a href="#">C00258</a>    | <a href="#">HMDB00139</a>           | 1.18                      | 0.78 | 1.33 | 0.84 | 1.70 |
| 434   |                                                    |                                                              | Glycolysis, gluconeogenesis, pyruvate metabolism | glucose-6-phosphate (G6P) | GC/MS                     | 31260                     | <a href="#">C00668</a>              | <a href="#">HMDB01401</a> | 1.06 | 1.19 | 0.87 | 0.92 |
| 436   |                                                    | glucose                                                      |                                                  | GC/MS                     | 20488                     | <a href="#">C00293</a>    | <a href="#">HMDB00122</a>           | 1.17                      | 0.93 | 1.25 | 0.99 | 1.85 |
| 439   |                                                    | fructose-6-phosphate                                         |                                                  | GC/MS                     | 12021                     | <a href="#">C05345</a>    | <a href="#">HMDB00124</a>           | 1.04                      | 1.22 | 1.14 | 1.14 | 1.30 |
| 447   |                                                    | 1,3-dihydroxyacetone                                         |                                                  | GC/MS                     | 35963                     | <a href="#">C00184</a>    | <a href="#">HMDB01882</a>           | 1.07                      | 0.78 | 1.36 | 1.03 | 3.05 |
| 457   |                                                    | Glyoxylate and dicarboxylate metabolism                      |                                                  | oxalate (ethanedioate)    | GC/MS                     | 20694                     | <a href="#">C00209</a>              | <a href="#">HMDB02329</a> | 1.41 | 0.83 | 1.59 | 0.94 |
| 465   |                                                    | Nucleotide sugars, pentose metabolism                        | sedoheptulose-7-phosphate                        | GC/MS                     | 35649                     | <a href="#">C05382</a>    | <a href="#">HMDB01068</a>           | 1.33                      | 1.23 | 1.18 | 0.90 | 3.55 |
| 466   |                                                    |                                                              | gluconate                                        | GC/MS                     | 587                       | <a href="#">C00257</a>    | <a href="#">HMDB00625</a>           | 0.78                      | 1.16 | 1.28 | 0.78 | 2.01 |
| 468   | ribose                                             |                                                              | GC/MS                                            | 12083                     | <a href="#">C00121</a>    | <a href="#">HMDB00283</a> | 1.49                                | 1.25                      | 0.99 | 0.75 | 0.58 |      |
| 475   | Isobar: ribulose 5-phosphate, xylulose 5-phosphate |                                                              | GC/MS                                            | 37288                     |                           |                           | 0.73                                | 0.95                      | 1.00 | 0.78 | 0.80 |      |
| 476   | UDP-glucose                                        |                                                              | GC/MS                                            | 32344                     | <a href="#">C00029</a>    | <a href="#">HMDB00286</a> | 1.02                                | 0.88                      | 1.11 | 0.77 | 0.86 |      |
| 480   | arabinose                                          | GC/MS                                                        | 575                                              | <a href="#">C00181</a>    | <a href="#">HMDB00646</a> | 1.10                      | 1.09                                | 1.03                      | 1.23 | 1.00 |      |      |
| 491   | Energy                                             | Krebs cycle                                                  | citrate                                          | GC/MS                     | 1564                      | <a href="#">C00158</a>    | <a href="#">HMDB00094</a>           | 1.36                      | 0.82 | 1.35 | 0.80 | 2.22 |
| 493   |                                                    |                                                              | cis-aconitate                                    | LC/MS neg                 | 12025                     | <a href="#">C00417</a>    | <a href="#">HMDB00072</a>           | 0.94                      | 0.84 | 1.11 | 0.91 | 0.94 |
| 498   |                                                    |                                                              | isocitrate                                       | LC/MS pos                 | 12110                     | <a href="#">C00311</a>    | <a href="#">HMDB00193.HMDB01874</a> | 0.98                      | 0.94 | 1.50 | 1.06 | 1.82 |
| 500   |                                                    |                                                              | alpha-ketoglutarate                              | GC/MS                     | 33453                     | <a href="#">C00026</a>    | <a href="#">HMDB00208</a>           | 1.08                      | 1.09 | 1.49 | 0.92 | 1.80 |
| 501   |                                                    |                                                              | succinate                                        | LC/MS neg                 | 1437                      | <a href="#">C00042</a>    | <a href="#">HMDB00254</a>           | 1.00                      | 1.24 | 0.70 | 0.93 | 0.34 |
| 504   |                                                    |                                                              | fumarate                                         | GC/MS                     | 1643                      | <a href="#">C00122</a>    | <a href="#">HMDB00134</a>           | 1.05                      | 0.88 | 1.44 | 0.88 | 1.86 |
| 507   |                                                    | malate                                                       | GC/MS                                            | 1303                      | <a href="#">C00149</a>    | <a href="#">HMDB00156</a> | 0.80                                | 1.27                      | 1.58 | 0.75 | 2.66 |      |
| 511   |                                                    | Oxidative phosphorylation                                    | phosphate                                        | LC/MS neg                 | 34425                     | <a href="#">C00009</a>    | <a href="#">HMDB01429</a>           | 1.00                      | 0.97 | 1.00 | 1.01 | 1.09 |
| 512   |                                                    |                                                              | pyrophosphate (PPi)                              | GC/MS                     | 2078                      | <a href="#">C00013</a>    | <a href="#">HMDB00250</a>           | 1.14                      | 0.62 | 0.94 | 0.44 | 0.68 |
| 512.5 |                                                    | Essential fatty acid                                         | linoleate (18:2n6)                               | linoleate (18:2n6)        | LC/MS neg                 | 1105                      | <a href="#">C01595</a>              | <a href="#">HMDB00673</a> | 0.96 | 1.14 | 1.45 | 1.22 |
| 516   | linolenate [alpha or gamma; (18:3n3 or 6)]         |                                                              |                                                  | LC/MS neg                 | 34035                     | <a href="#">C06427</a>    | <a href="#">HMDB01388</a>           | 1.08                      | 1.00 | 1.61 | 1.20 | 6.15 |
| 532   | Medium chain fatty acid                            |                                                              | laurate (12:0)                                   | LC/MS neg                 | 1645                      | <a href="#">C02679</a>    | <a href="#">HMDB00638</a>           | 0.80                      | 1.00 | 1.02 | 1.15 | 1.24 |
| 538   |                                                    |                                                              | palmitate (16:0)                                 | GC/MS                     | 1336                      | <a href="#">C00249</a>    | <a href="#">HMDB00220</a>           | 0.97                      | 1.05 | 1.51 | 0.87 | 2.07 |
| 539   | Long chain fatty acid                              |                                                              | palmitoleate (16:1n7)                            | GC/MS                     | 1507                      | <a href="#">C08362</a>    | <a href="#">HMDB03229</a>           | 1.27                      | 0.54 | 1.69 | 1.32 | 4.69 |
| 541   |                                                    |                                                              | margarate (17:0)                                 | LC/MS neg                 | 1121                      |                           | <a href="#">HMDB02259</a>           | 0.89                      | 0.91 | 1.22 | 1.07 | 1.54 |
| 542   |                                                    |                                                              | 10-heptadecenoate (17:1n7)                       | LC/MS neg                 | 33971                     |                           |                                     | 0.95                      | 0.92 | 1.42 | 1.14 | 4.03 |
| 543   |                                                    |                                                              | stearate (18:0)                                  | GC/MS                     | 1358                      | <a href="#">C01530</a>    | <a href="#">HMDB00827</a>           | 0.87                      | 1.11 | 1.17 | 1.00 | 1.49 |
| 544   |                                                    |                                                              | tuberculostearate                                | GC/MS                     | 34163                     |                           | <a href="#">HMDB04085</a>           | 1.05                      | 0.98 | 1.16 | 1.18 | 0.86 |
| 545   |                                                    |                                                              | oleate (18:1n9)                                  | LC/MS neg                 | 1359                      | <a href="#">C00712</a>    | <a href="#">HMDB00207</a>           | 1.03                      | 1.21 | 1.30 | 1.18 | 6.42 |

|       |                                           |                                             |           |       |                               |                                     |      |      |      |      |       |
|-------|-------------------------------------------|---------------------------------------------|-----------|-------|-------------------------------|-------------------------------------|------|------|------|------|-------|
| 554   |                                           | 10-nonadecenoate (19:1n9)                   | LC/MS neg | 33972 |                               |                                     | 1.23 | 1.00 | 1.07 | 0.99 | 8.63  |
| 573   |                                           | lignocerate (24:0)                          | GC/MS     | 1364  | <a href="#">C08320</a>        | <a href="#">HMDB02003</a>           | 1.00 | 1.00 | 1.23 | 1.00 | 3.49  |
| 576   |                                           | hexacosanoate (26:0)                        | GC/MS     | 21143 |                               | <a href="#">HMDB02356</a>           | 1.01 | 1.12 | 1.29 | 1.00 | 3.90  |
| 589   | Fatty acid, ester                         | n-Butyl Oleate                              | GC/MS     | 36802 |                               |                                     | 0.99 | 1.04 | 0.91 | 0.80 | 1.28  |
| 591   |                                           | 4-hydroxybutyrate (GHB)                     | GC/MS     | 34585 | <a href="#">C00989</a>        | <a href="#">HMDB00710</a>           | 1.00 | 1.04 | 0.90 | 1.08 | 1.80  |
| 596   |                                           | 8-hydroxyoctanoate                          | LC/MS neg | 21239 |                               | <a href="#">HMDB00711</a>           | 1.13 | 0.87 | 0.81 | 1.13 | 1.78  |
| 599   | Fatty acid, monohydroxy                   | 2-hydroxymyristate                          | LC/MS neg | 32413 | <a href="#">C13790</a>        | <a href="#">HMDB02261</a>           | 0.82 | 1.18 | 1.00 | 1.12 | 1.27  |
| 602   |                                           | 2-hydroxystearate                           | LC/MS neg | 17945 | <a href="#">C03045</a>        |                                     | 1.02 | 1.24 | 1.01 | 0.86 | 1.05  |
| 604   |                                           | 2-hydroxypalmitate                          | LC/MS neg | 35675 |                               |                                     | 0.93 | 1.02 | 0.83 | 1.13 | 1.51  |
| 608   |                                           | 13-HODE + 9-HODE                            | LC/MS neg | 37752 |                               |                                     | 2.81 | 3.31 | 1.91 | 0.77 | 12.18 |
| 615   | Fatty acid, dicarboxylate                 | sebacate (decanedioate)                     | LC/MS neg | 32398 | <a href="#">C08277</a>        | <a href="#">HMDB00792</a>           | 1.02 | 1.06 | 1.13 | 1.08 | 1.58  |
| 616   |                                           | azelate (nonanedioate)                      | LC/MS neg | 18362 | <a href="#">C08261</a>        | <a href="#">HMDB00784</a>           | 0.81 | 1.24 | 1.00 | 1.21 | 1.37  |
| 619   |                                           | hexadecanedioate                            | LC/MS neg | 35678 |                               | <a href="#">HMDB00672</a>           | 0.86 | 0.77 | 1.15 | 1.24 | 1.88  |
| 626   | Fatty acid, amide                         | stearamide                                  | LC/MS pos | 37487 | <a href="#">C13846</a>        |                                     | 0.97 | 1.04 | 0.85 | 1.37 | 1.20  |
| 632.6 | Fatty acid, branched                      | 15-methylpalmitate                          | GC/MS     | 38295 |                               |                                     | 1.00 | 1.82 | 1.88 | 0.66 | 7.46  |
| 679   | Endocannabinoid                           | palmitoylethanolamide                       | LC/MS neg | 38165 |                               |                                     | 0.95 | 0.86 | 1.15 | 1.13 | 1.07  |
| 679.1 |                                           | stearoylethanolamide                        | GC/MS     | 38625 |                               |                                     | 1.03 | 0.97 | 1.22 | 0.87 | 0.95  |
| 744   | Fatty alcohol, long chain                 | 1-octadecanol                               | GC/MS     | 21128 | <a href="#">D01924</a>        | <a href="#">HMDB02350</a>           | 0.60 | 0.84 | 1.87 | 1.21 | 1.76  |
| 746   |                                           | ethanolamine                                | GC/MS     | 34285 | <a href="#">C00189</a>        | <a href="#">HMDB00149</a>           | 0.91 | 0.89 | 1.29 | 0.91 | 1.10  |
| 749   |                                           | diethanolamine                              | GC/MS     | 20691 | <a href="#">C06772</a>        | <a href="#">HMDB04437</a>           | 0.83 | 1.05 | 0.96 | 0.92 | 1.12  |
| 750   | Glycerolipid metabolism                   | glycerol                                    | GC/MS     | 15122 | <a href="#">C00116</a>        | <a href="#">HMDB00131</a>           | 1.06 | 0.83 | 1.24 | 0.76 | 1.66  |
| 752   |                                           | glycerol 3-phosphate (G3P)                  | GC/MS     | 15365 | <a href="#">C00093</a>        | <a href="#">HMDB00126</a>           | 1.02 | 0.69 | 0.70 | 0.96 | 0.14  |
| 760   | Inositol metabolism                       | myo-inositol                                | GC/MS     | 19934 | <a href="#">C00137</a>        | <a href="#">HMDB00211</a>           | 0.98 | 1.00 | 0.69 | 0.88 | 0.32  |
| 763   |                                           | inositol 1-phosphate (I1P)                  | GC/MS     | 1481  |                               | <a href="#">HMDB00213</a>           | 0.94 | 0.80 | 1.03 | 1.01 | 0.40  |
| 776   | Lysolipid                                 | 2-palmitoylglycerophosphoethanolamine*      | LC/MS pos | 35684 |                               |                                     | 0.96 | 0.79 | 0.60 | 0.92 | 0.28  |
| 813   |                                           | 1-docosahexaenoylglycerophosphocholine*     | LC/MS pos | 33822 |                               |                                     | 2.13 | 1.00 | 1.89 | 1.14 | 0.46  |
| 955   |                                           | adenine                                     | GC/MS     | 554   | <a href="#">C00147</a>        | <a href="#">HMDB00034</a>           | 1.22 | 0.61 | 0.71 | 0.82 | 0.25  |
| 956   |                                           | adenosine                                   | LC/MS pos | 555   | <a href="#">C00212</a>        | <a href="#">HMDB00050</a>           | 1.18 | 0.98 | 1.13 | 0.72 | 0.69  |
| 964   |                                           | adenosine 5'-monophosphate (AMP)            | LC/MS pos | 32342 | <a href="#">C00020</a>        | <a href="#">HMDB00045</a>           | 1.07 | 0.89 | 0.83 | 0.92 | 0.27  |
| 966.5 | Purine metabolism, adenine containing     | adenosine-5'-diphosphoglucose               | LC/MS neg | 35652 | <a href="#">C06192,C00498</a> | <a href="#">HMDB06369.HMDB06557</a> | 0.92 | 0.72 | 0.99 | 0.84 | 0.36  |
| 970   | Nucleotide                                | adenosine 3',5'-cyclic monophosphate (cAMP) | LC/MS neg | 2831  | <a href="#">C00575</a>        | <a href="#">HMDB00058</a>           | 0.83 | 0.72 | 0.91 | 0.52 | 1.60  |
| 1016  | Pyrimidine metabolism, thymine containing | thymine                                     | GC/MS     | 604   | <a href="#">C00178</a>        | <a href="#">HMDB00262</a>           | 1.07 | 0.94 | 0.78 | 0.88 | 0.51  |
| 1019  |                                           | thymidine 5'-monophosphate                  | LC/MS neg | 12023 | <a href="#">C00364</a>        | <a href="#">HMDB01227</a>           | 1.14 | 0.83 | 0.75 | 1.24 | 0.41  |
| 1022  | Pyrimidine metabolism, uracil containing  | uracil                                      | GC/MS     | 605   | <a href="#">C00106</a>        | <a href="#">HMDB00300</a>           | 0.91 | 0.61 | 0.74 | 0.75 | 1.26  |
| 1036  | Purine and pyrimidine metabolism          | methylphosphate                             | GC/MS     | 37070 |                               |                                     | 0.99 | 0.84 | 1.02 | 1.08 | 1.15  |
| 1047  | Biotin metabolism                         | biotin                                      | LC/MS pos | 568   | <a href="#">C00120</a>        | <a href="#">HMDB00030</a>           | 1.24 | 0.91 | 1.36 | 0.97 | 2.01  |
| 1063  |                                           | nicotinamide                                | LC/MS pos | 594   | <a href="#">C00153</a>        | <a href="#">HMDB01406</a>           | 0.96 | 0.82 | 1.23 | 0.77 | 1.34  |
| 1066  | Nicotinate and nicotinamide metabolism    | nicotinamide adenine dinucleotide (NAD+)    | LC/MS pos | 5278  | <a href="#">C00003</a>        | <a href="#">HMDB00902</a>           | 0.97 | 0.76 | 0.63 | 1.03 | 0.14  |
| 1077  |                                           | nicotinate                                  | LC/MS pos | 1504  | <a href="#">C00253</a>        | <a href="#">HMDB01488</a>           | 1.26 | 0.83 | 1.21 | 0.92 | 0.60  |
| 1079  | Cofactors and vitamins                    | nicotinic acid mononucleotide (NaMN)        | LC/MS pos | 32461 |                               | <a href="#">HMDB01132</a>           | 1.27 | 1.09 | 0.73 | 1.11 | 0.77  |
| 1080  |                                           | nicotinate ribonucleoside*                  | LC/MS pos | 33471 | <a href="#">C05841</a>        | <a href="#">HMDB06809</a>           | 1.17 | 1.08 | 0.90 | 0.98 | 0.83  |

|        |                                 |                            |                         |           |                               |                           |                           |             |             |             |             |
|--------|---------------------------------|----------------------------|-------------------------|-----------|-------------------------------|---------------------------|---------------------------|-------------|-------------|-------------|-------------|
| 1085   | Pantothenate and CoA metabolism | pantothenate               | LC/MS pos               | 1508      | <a href="#">C00864</a>        | <a href="#">HMDB00210</a> | 0.94                      | 1.07        | 0.70        | <b>1.25</b> | 0.54        |
| 1089   |                                 | acetyl CoA                 | LC/MS neg               | 32484     | <a href="#">C00024</a>        | <a href="#">HMDB01206</a> | 1.06                      | 1.20        | 1.18        | 1.06        | 0.63        |
| 1119   |                                 | Vitamin B6 metabolism      | pyridoxine (Vitamin B6) | LC/MS pos | 608                           | <a href="#">C00314</a>    | <a href="#">HMDB02075</a> | 1.17        | 0.92        | 1.31        | 0.94        |
| 1128   | Benzoate metabolism             | 2-(hydroxymethyl)phenol    | GC/MS                   | 37492     | <a href="#">C02323</a>        |                           | 1.40                      | 0.77        | 0.97        | <b>0.67</b> | 1.20        |
| 1137   |                                 | 4-hydroxybenzoate          | GC/MS                   | 21133     | <a href="#">C00156</a>        | <a href="#">HMDB00500</a> | 1.08                      | 0.98        | 0.95        | 0.86        | 0.86        |
| 1150   | Chemical                        | bicine                     | GC/MS                   | 20708     |                               | <a href="#">HMDB11727</a> | 0.87                      | 1.18        | 0.96        | 0.90        | 1.19        |
| 1151   |                                 | glycolate (hydroxyacetate) | GC/MS                   | 15737     | <a href="#">C00160</a>        | <a href="#">HMDB00115</a> | 1.08                      | 0.90        | 1.29        | 1.06        | <b>1.61</b> |
| 1157   |                                 | glycerol 2-phosphate       | GC/MS                   | 27728     | <a href="#">C02979_D01488</a> | <a href="#">HMDB02520</a> | 1.08                      | <b>0.66</b> | 0.80        | <b>0.84</b> | <b>0.55</b> |
| 1161   |                                 | heptaethylene glycol       | LC/MS pos               | 38154     |                               |                           | 1.21                      | 0.98        | <b>1.39</b> | 0.96        | <b>2.08</b> |
| 1162   |                                 | hexaethylene glycol        | LC/MS pos               | 38133     |                               |                           | 1.19                      | 0.93        | <b>1.62</b> | 0.92        | <b>2.22</b> |
| 1165   |                                 | tetraethylene glycol       | LC/MS pos               | 38101     |                               |                           | 0.96                      | 0.65        | <b>1.65</b> | 1.02        | <b>1.94</b> |
| 1165.5 |                                 | diethylene glycol          | GC/MS                   | 38099     |                               |                           | 2.50                      | 0.77        | 1.06        | 0.74        | 1.47        |
| 1175   |                                 | trizma acetate             | GC/MS                   | 20710     | <a href="#">C07182</a>        |                           | <b>0.11</b>               | 0.41        | 1.32        | 0.39        | 0.56        |
| 1196.5 |                                 | cyclohexylamine*           | GC/MS                   | 33452     | <a href="#">C00571</a>        |                           | 1.09                      | 1.17        | 1.10        | 0.94        | 1.25        |
| 1206.6 |                                 | dexpanthenol               | LC/MS pos               | 38314     | <a href="#">D03726</a>        | <a href="#">HMDB04231</a> | 0.86                      | 0.80        | 0.98        | 0.68        | <b>0.29</b> |
| 1207.9 |                                 | 3-(2-pyrrolidinyl)pyridine | LC/MS pos               | 38122     |                               |                           | 1.08                      | 1.08        | 1.21        | 1.04        | 1.31        |
| 1212   | Drug                            | salicylate                 | GC/MS                   | 1515      | <a href="#">C00805</a>        | <a href="#">HMDB01895</a> | 0.81                      | 0.85        | <b>1.91</b> | 0.87        | 0.92        |
| 1287   | Food component/Plant            | 4-hydroxybenzyl alcohol    | GC/MS                   | 15127     | <a href="#">C17467</a>        | <a href="#">HMDB11724</a> | 22.52                     | 0.91        | 0.89        | <b>0.55</b> | 1.02        |
| 1330   |                                 | ergothioneine              | LC/MS pos               | 37459     | <a href="#">C05570</a>        | <a href="#">HMDB03045</a> | 1.02                      | 0.81        | 0.49        | 0.98        | <b>0.11</b> |
| 1334   |                                 | 5-hydroxymethylfurfural    | LC/MS pos               | 37429     | <a href="#">C11101</a>        |                           | <b>1.77</b>               | 0.79        | <b>1.19</b> | 1.41        | <b>2.25</b> |
| 1358   | Sugar, sugar substitute, starch | trehalose 6-phosphate      | GC/MS                   | 15802     | <a href="#">C00689</a>        | <a href="#">HMDB01124</a> | 1.00                      | <b>0.69</b> | <b>0.53</b> | <b>0.56</b> | <b>0.24</b> |
| 1360   |                                 | erythritol                 | GC/MS                   | 20699     | <a href="#">C00503</a>        | <a href="#">HMDB02994</a> | 1.20                      | <b>0.81</b> | 1.43        | 0.82        | 1.47        |
| 1380.1 | Bacterial                       | mycothione (MSSM)*         | LC/MS pos               | 38682     |                               |                           | 0.99                      | 0.83        | 0.57        | 0.85        | <b>0.12</b> |
